# Supplementary figures and images for: Aerobic oxidation of alcohols and alkenes over a novel lacunary phosphomolybdate anchored to zeolite Hβ
Source: Royal Society of Chemistry journal article supplement (doi:10.1039/c5ra03550c), 2015-01-01

Supporting information

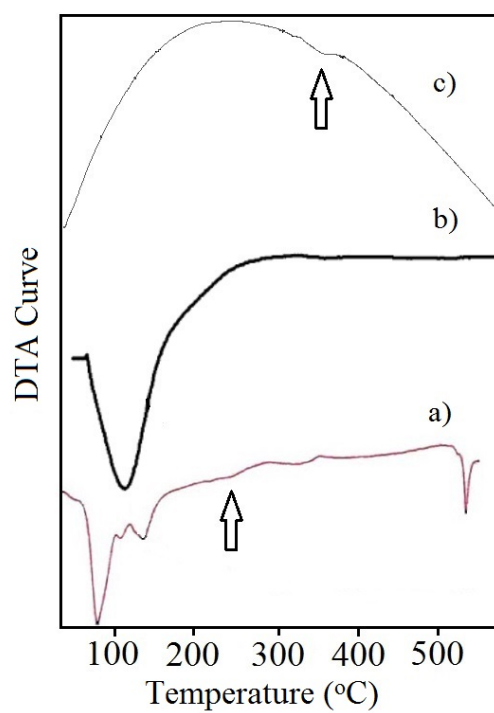

**SM 1.** DTA curves for a)  $\text{PMo}_{11}$ , b)  $\text{H}\beta$  and c) 30%  $\text{PMo}_{11}/\text{H}\beta$ .

Supplement: c5ra03550c1.pdf [file c5ra03550c1.pdf]
